# Supplementary material
Source: publisher site journal article supplement (https://www.spandidos-publications.com/6358/downloadSupplementary)

Figure S1. Fluorescence observation in MAC-T cells. (A) Non-transfected MAC-T cells, (B) MAC-T cells transfected with pEGFP-N1 vector and (C) MAC-T cells transfected with pEGFP-SIRT5 vector. Magnification, x40. pEGFP, plasmid expressing enhanced green fluorescence protein (control); SIRT5, sirtuin 5.

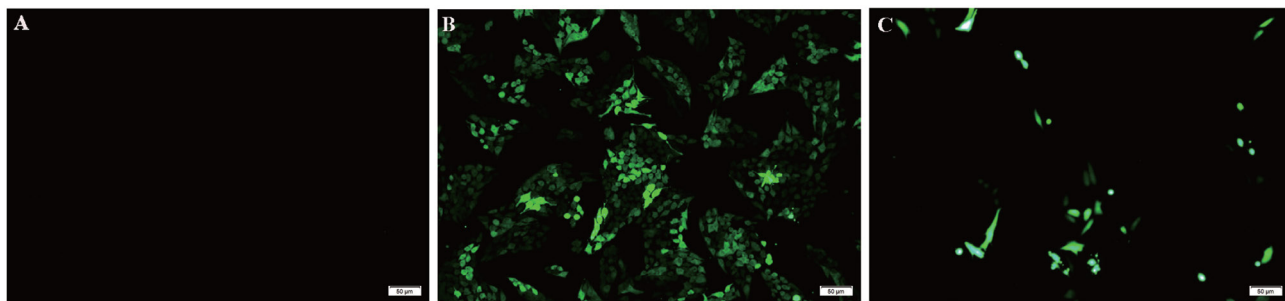

Supplement: Supplementary file 1 [file downloadSupplementary]
